# Supplementary material for: Population structure in the Andaman keelback,Xenochrophis tytleri: geographical distance and oceanic barriers to dispersal influence genetic divergence on the Andaman archipelago
Source: PeerJ journal article supplement (doi:10.7717/peerj.5752), 2018-10-09
Supplement: Supplementary_2.pdf [file Supplementary_2.pdf]

| Run | No of groups | Details of groups         | No of populations | Details of populations    | Fst  | Fsc  | Fct  |  |
|-----|--------------|---------------------------|-------------------|---------------------------|------|------|------|--|
| 1   | 3            | 1-SA, 2-LA, 3-MA,B,H,L,NA | 7                 | Each island               | 0.82 | 0.54 | 0.61 |  |
| 2   | 2            | 1-SA, LA 2-MA,NA,B,H,L    | 7                 | Each island               | 0.82 | 0.69 | 0.46 |  |
| 2   | 3            | 1-SA, 2-LA, 3-MA,B,H,L,NA | 4                 | 1-SA,2-LA,3-MA,H,L,B 4-NA | 0.77 | 0.23 | 0.7  |  |
| 3   | 2            | 1-SA, LA 2-MA,NA,B,H,L    | 4                 | 1-SA,2-LA,3-MA,H,L,B 4-NA | 0.76 | 0.58 | 0.44 |  |
|     |              |                           |                   |                           |      |      |      |  |
|     |              |                           |                   |                           |      |      |      |  |
|     |              | X                         | presented results |                           |      |      |      |  |
|     |              | SA                        | South Andaman     |                           |      |      |      |  |
|     |              | LA                        | Little Andaman    |                           |      |      |      |  |
|     |              | MA                        | Middle Andaman    |                           |      |      |      |  |
|     |              | NA                        | North Andaman     |                           |      |      |      |  |
|     |              | B                         | Baratang          |                           |      |      |      |  |
|     |              | H                         | Havelock          |                           |      |      |      |  |
|     |              | L                         | Long Island       |                           |      |      |      |  |
