# Supplementary material for: Population structure in the Andaman keelback,Xenochrophis tytleri: geographical distance and oceanic barriers to dispersal influence genetic divergence on the Andaman archipelago
Source: PeerJ journal article supplement (doi:10.7717/peerj.5752), 2018-10-09
Supplement: Supplementary_3.pdf [file Supplementary_3.pdf]

| Class Index     | n dist   | Mantel.cor | Pr(Mantel) | Pr(corrected) |
|-----------------|----------|------------|------------|---------------|
| D.cl.1<br>30km  | 5.26E+02 | 9.12E-02   | 0.001      | 0.001*        |
| D.cl.2<br>70km  | 1.76E+03 | 4.29E-03   | 0.441      | 0.441         |
| D.cl.3<br>130km | 1.51E+03 | -4.70E-01  | 0.001      | 0.003*        |
| D.cl.4<br>240km | 1.23E+03 | -7.60E-02  | 0.01       | 0.020*        |
